# Supplementary material for: Nanospacial effect of citric acid-coordinated hydroxyapatite nanoparticle films on protein adsorption and cell adhesion states
Source: Royal Society of Chemistry journal article supplement (doi:10.1039/d2tb01240e), 2022-01-01
Supplement: d2tb01240e1.pdf [file d2tb01240e1.pdf]

**Electronic Supplementary Information**

**Nanospatial Effect of Citric Acid-Coordinated Hydroxyapatite Nanoparticle Films on Protein Adsorption and Cell Adhesion States**

Zizhen Liu,<sup>1</sup> Daisuke Kawagoe,<sup>2</sup> Motohiro Tagaya<sup>1,\*</sup>

<sup>1</sup> *Department of Materials Science and Technology, Graduate School of Engineering, Nagaoka University of Technology, 1603-1 Kamitomioka, Nagaoka, Niigata 940-2188, Japan*

<sup>2</sup> *Department of Materials Chemistry and Bioengineering, Oyama National College of Technology, 771 Nakakuki, Oyama, Tochigi 323-0806, Japan*

---

**\* Author to whom correspondence should be addressed:**

Tel: +81-258-47-9345; Fax: +81-258-47-9300

E-mail: tagaya@mst.nagaokaut.ac.jp

**Figure S1**

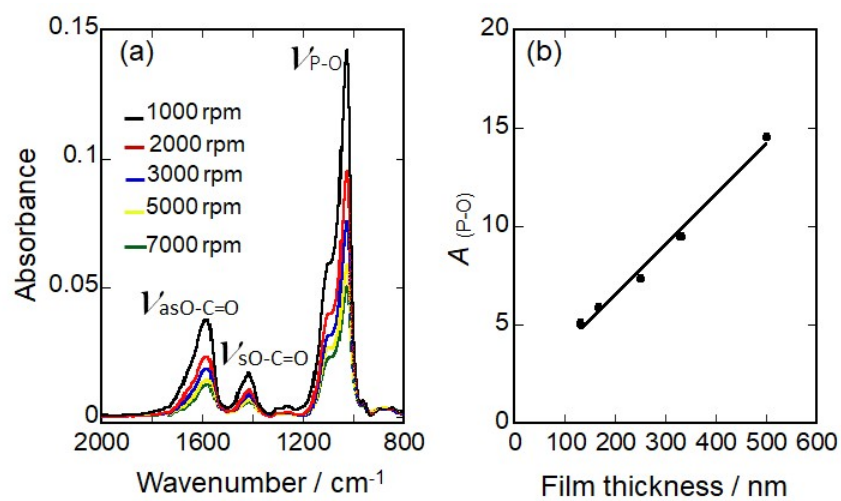

**Fig. S1** (a) The changes in absorbance of 3Cit/HA prepared at different spinning speeds and (b) the calibration curve between  $A_{\text{(P-O)}}$  and film thickness ( $R^2=0.9896$ ).

**Figure S2**

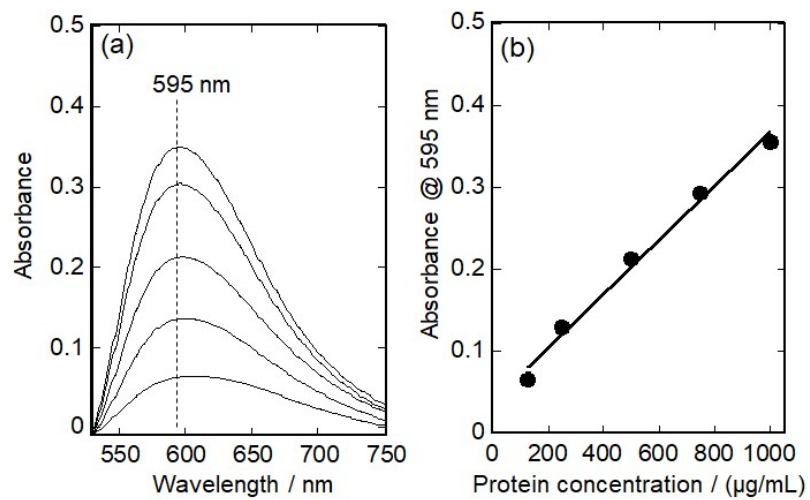

**Fig. S2** (a) UV-Vis absorption spectra of the BSA aqueous solution at different concentrations. (b) The calibration curve between the protein concentration and absorbance ( $R^2 = 0.9920$ ).

**Figure S3**

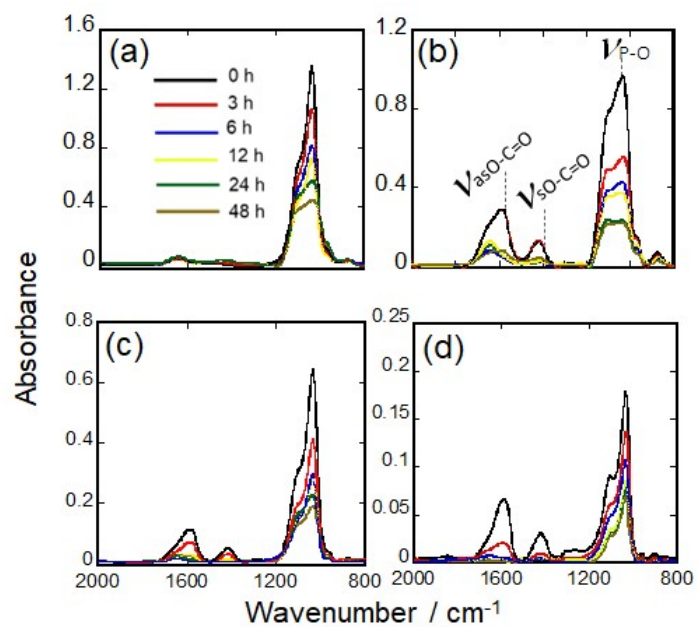

**Fig. S3** FT-IR spectra (2000–800  $\text{cm}^{-1}$ ) of (a) 0Cit/HA, (b) 1Cit/HA, (c) 2Cit/HA and (d) 3Cit/HA with different immersion time.

**Figure S4**

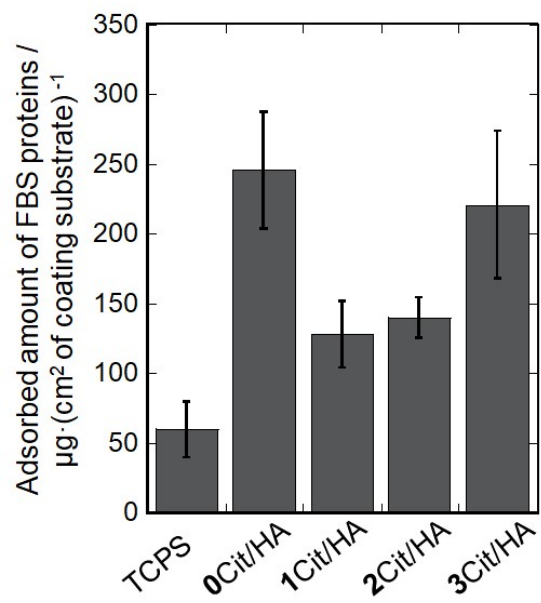

**Fig. S4** Adsorbed amount of FBS proteins ( $\mu\text{g} \cdot \text{cm}^{-2}$ ) on TCPS and Cit/HA nanoparticle films.

**Figure S5**

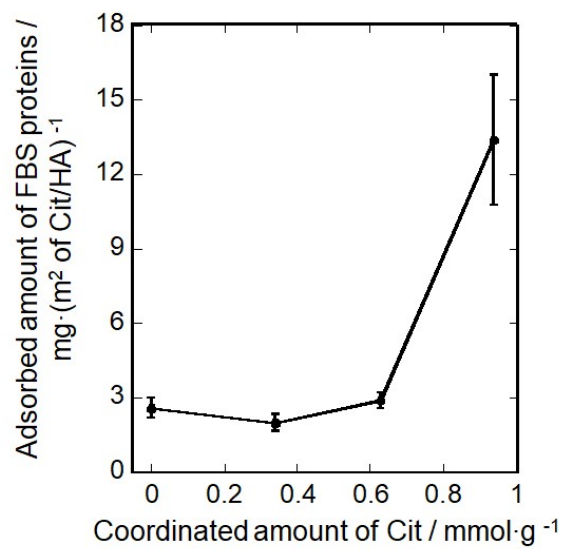

**Fig. S5** Adsorbed amount of FBS proteins (mg·m<sup>-2</sup>) on Cit/HA nanoparticle films with the coordinated amount of Cit.

**Figure S6**

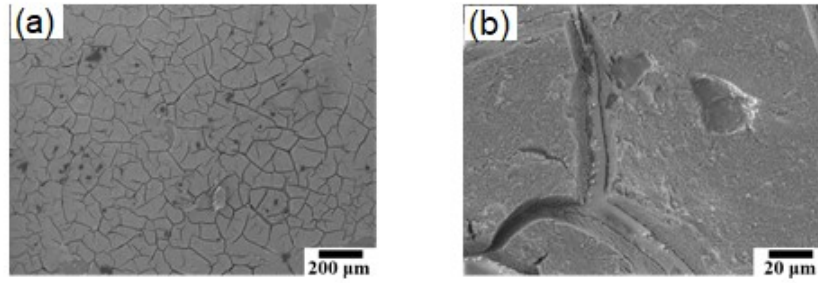

**Fig. S6** (a) Low- and (a) high-magnification SEM images of the cell adhesion on 0Cit/HA at the culture time of 48 h.

**Figure S7**

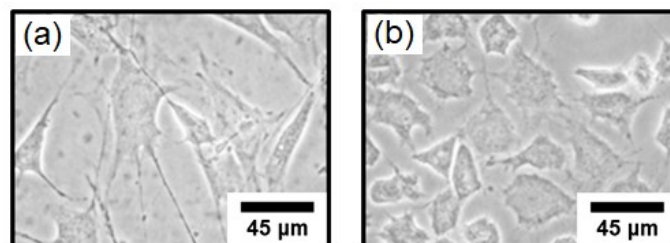

**Fig. S7** Micrographs for the observation of cell morphological changes on (a) 3Cit/HA and (b) TCPS at the culture time of 48 h.
